# Supplementary material for: Maintenance of pluripotency in the entire ectoderm enables neural crest formation
Source: Research Square preprint supplement (doi:10.21203/rs.3.rs-2285117/v1), 2023-01-25
Supplement: Supplementary file 1 [file 0847f8fec5e27dc3fcc0af9e.xlsx]

## Sheet: Sheet1
	Panecto	p_val	avg_log2FC	p_val_adj	others	p_val	avg_log2FC	p_val_adj
HH5	DLX5	3.14e-40	0.533582	4.57e-36	SOX21	8.49e-22	0.330498	1.24e-17
	CLDN3	9.29e-27	0.482705	1.35e-22	LMO1	3.78e-18	0.299209	5.51e-14
	SMAD1	1.68e-12	0.21515	2.45e-08
	MSX1	1.85e-30	0.515532	2.69e-26
	Panecto	p_val	avg_log2FC	p_val_adj	others	p_val	avg_log2FC	p_val_adj
1som	DLX5	2.57441e-49	0.768112	3.74886e-45	SOX21	1.92622e-17	0.298301	2.80496e-13
	CLDN3	1.12895e-41	1.00786	1.64397e-37	LMO1	3.36645e-15	0.27236	4.90223e-11
	SIX1	2.84756e-11	0.279011	4.14661e-07
	SMAD1	5.33964e-10	0.26249	7.77558e-06
	MSX1	4.945e-49	1.13907	7.20091e-45
	Panecto	p_val	avg_log2FC	p_val_adj	others	p_val	avg_log2FC	p_val_adj
4som	DLX5	6.14582e-56	0.67424	8.94954e-52	SOX21	1.05142e-50	0.493247	1.53108e-46
	CLDN3	1.60285e-40	0.782297	2.33407e-36	LMO1	1.06288e-32	0.358884	1.54776e-28
	SIX1	3.77388e-28	0.365863	5.49553e-24	HES5	4.08847e-10	0.360994	5.95362e-06
	MSX1	1.86813e-32	0.956568	2.72037e-28	FABP7	2.83474e-20	0.298992	4.12795e-16
	SP5	1.76839e-05	0.225633	0.257513
	Panecto	p_val	avg_log2FC	p_val_adj	others	p_val	avg_log2FC	p_val_adj
7som	DLX5	3.13e-69	0.775926	4.56e-65	SOX21	1.04e-65	0.661725	1.52e-61
	SNAI2	2.85e-28	0.584365	4.15e-24	LMO1	6.52e-31	0.377502	9.49e-27
	MSX1	2.93e-15	0.45803	4.26e-11	HES5	1.6e-20	0.620966	2.33e-16
					FABP7	4.04e-18	0.283076	5.88e-14
					MYCN	3.97e-15	0.337398	5.78e-11
